# Supplementary material for: Synthesis of Donor–Acceptor Copolymers Derived from Diketopyrrolopyrrole and Fluorene via Eco-Friendly Direct Arylation: Nonlinear Optical Properties, Transient Absorption Spectroscopy, and Theoretical Modeling
Source: MDPI journal article supplement (doi:10.3390/en15113855), 2022-05-24
Supplement: s1 [file s1]

## Supplementary Data

FT-IR

**Table S1.** Main vibration modes in the **PFDPP** family of polymers

| Vibration mode                                     | PFDPP-1                         | PFDPP-2 | PFDPP-3 |
|----------------------------------------------------|---------------------------------|---------|---------|
|                                                    | Wave number (cm <sup>-1</sup> ) |         |         |
| =C-H st                                            | 3066                            | 3066    | 3066    |
| CH <sub>3</sub> v <sub>as</sub>                    | 2959                            | 2959    | 2956    |
| CH <sub>2</sub> v <sub>as</sub>                    | 2925                            | 2925    | 2919    |
| CH <sub>2</sub> v <sub>s</sub>                     | 2852                            | 2852    | 2852    |
| C=O st                                             | 1664                            | 1658    | 1658    |
| C-N st                                             | 1537                            | 1544    | 1551    |
| C=C st                                             | 1510                            | 1510    | 1510    |
| δ(C-H) in the thiophene plane                      | 1068                            | 1061    | 1061    |
| S, thiophene                                       | 793                             | 793     | 786     |
| C-H out of plane of the thiophene ring v           | 731                             | 731     | 732     |
| Deformation C-H out of plane of the thiophene ring | 625                             | 632     | 632     |

$^1\text{H}$  NMR

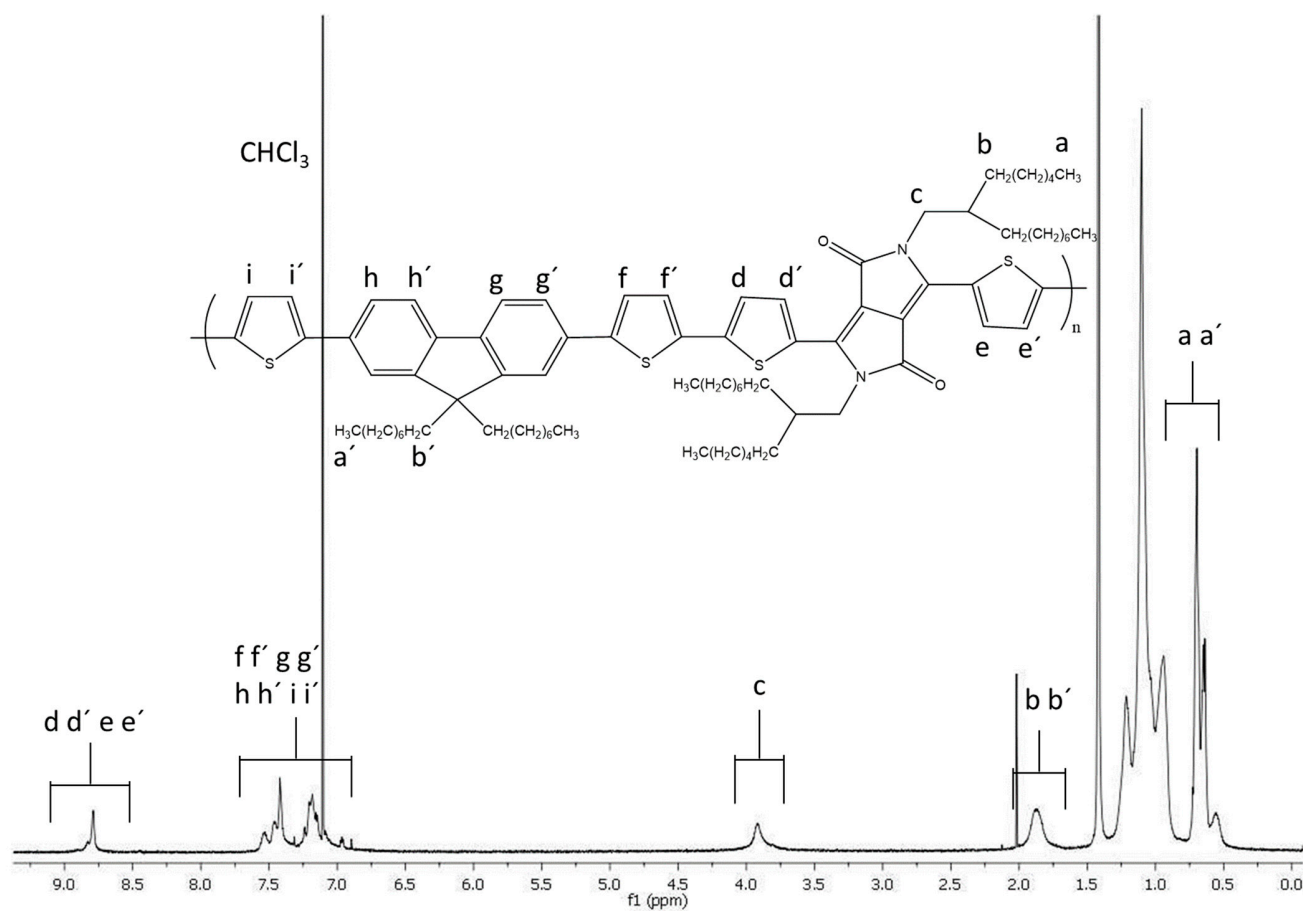

**Figure S1.**  $^1\text{H}$  NMR spectra of **PFDPP-2** in  $\text{CDCl}_3$

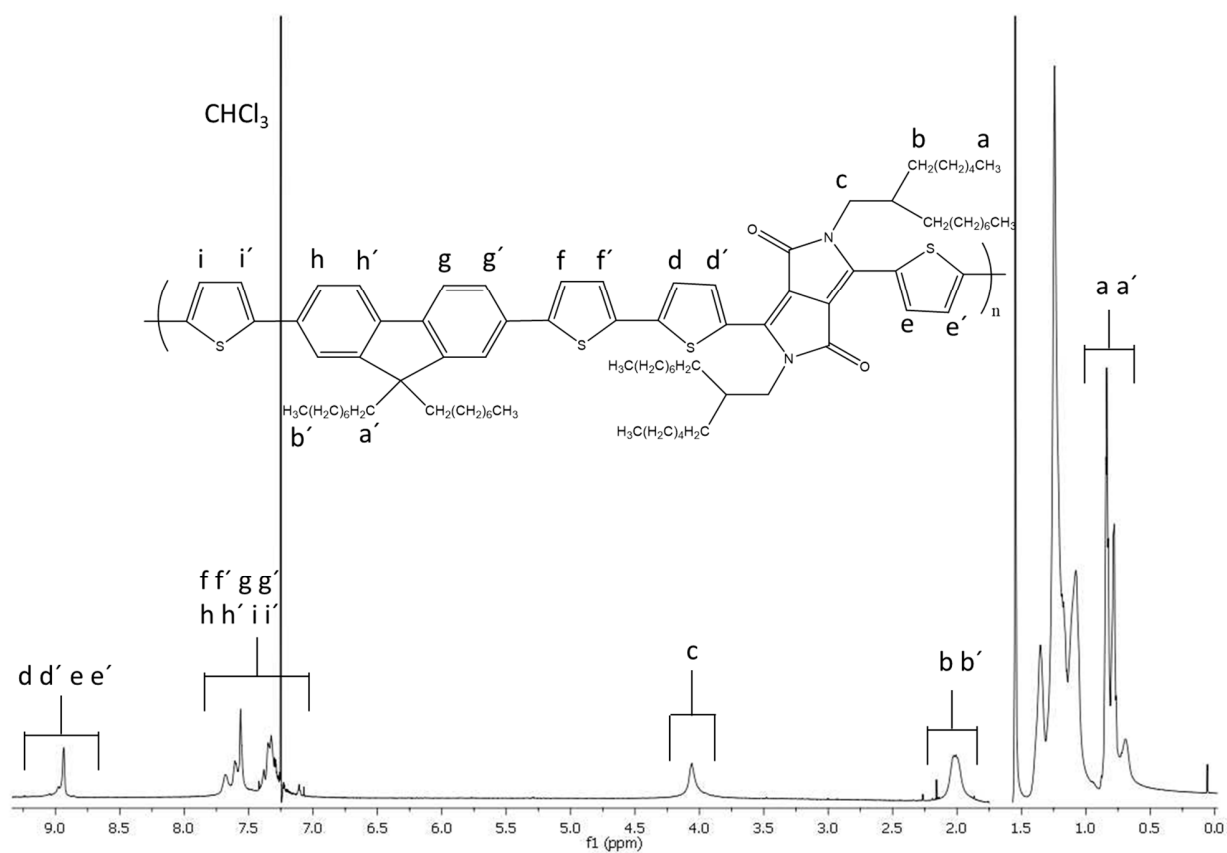

**Figure S2.**  $^1\text{H}$  NMR spectra of PFDPP-3 in  $\text{CDCl}_3$

## GPC

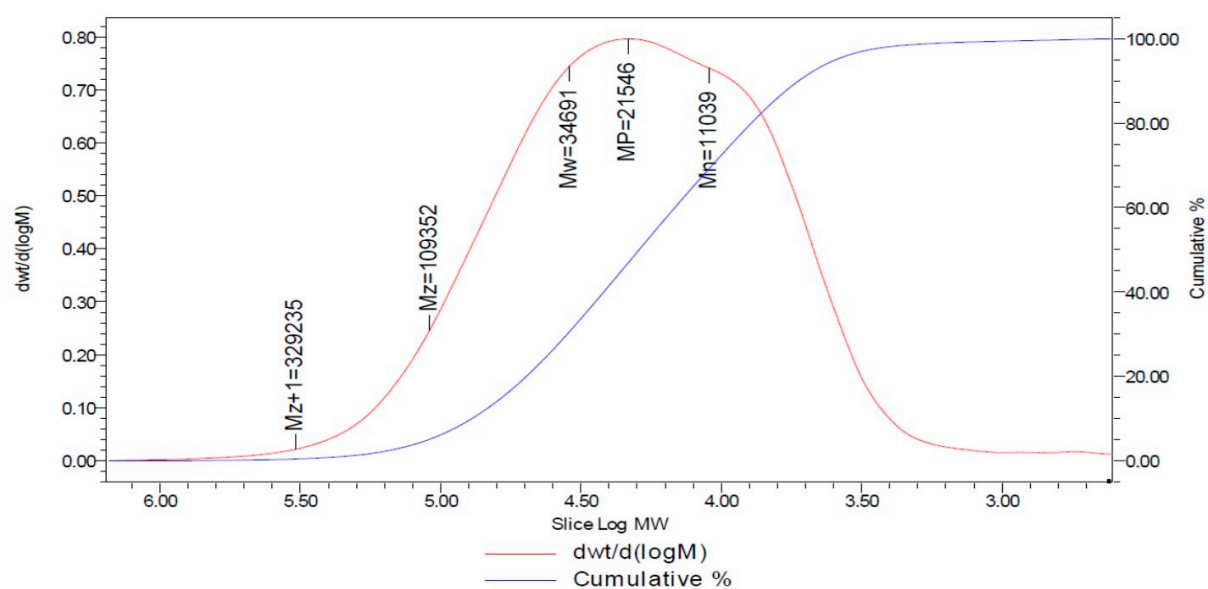

**Figure S3.** Molecular weight distribution of PFDPP-1

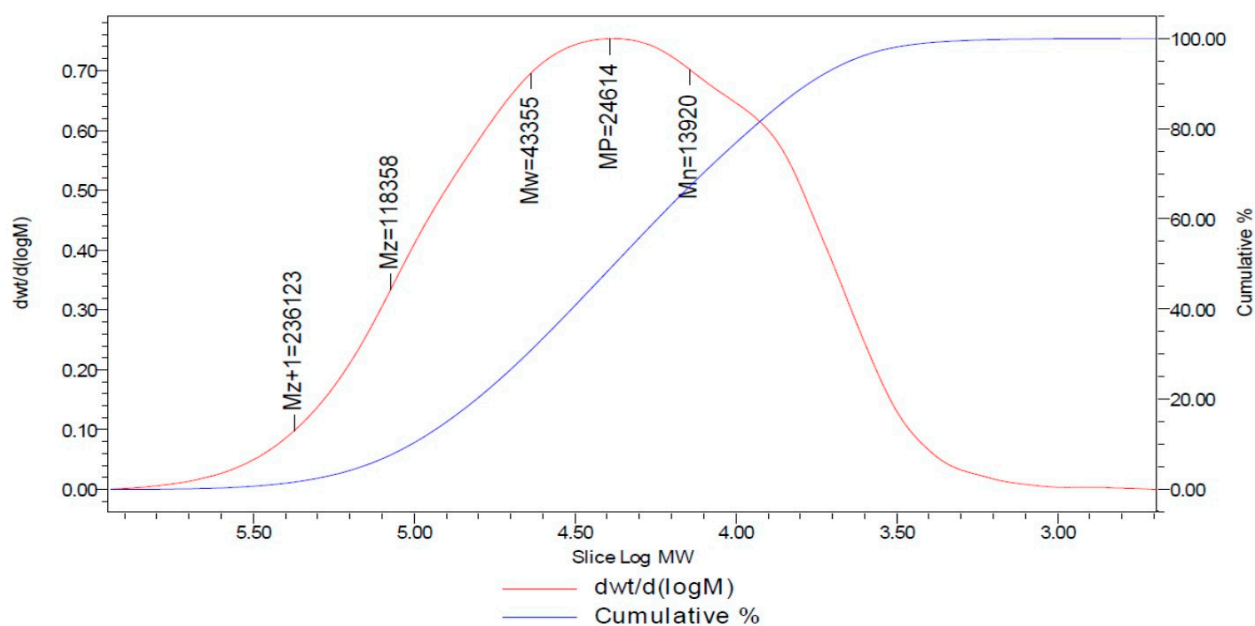

**Figure S4.** Molecular weight distribution of **PFDPP-2**

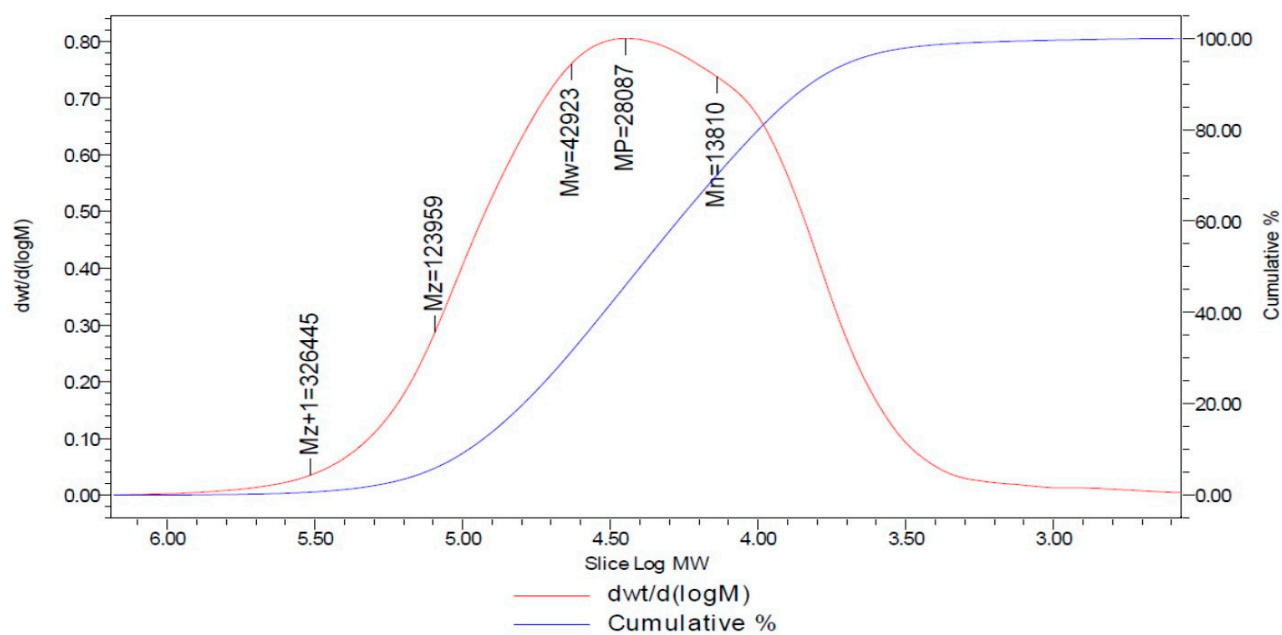

**Figure S5.** Molecular weight distribution of **PFDPP-3**

**Table S2.** Fitting of lifetime fluorescence of the **PFDPP** polymers

| Polymer        | $\tau_1$ (ns) | $B_1$ | $\tau_2$ (ns) | $B_2$ |
|----------------|---------------|-------|---------------|-------|
| <b>PFDPP-1</b> | 0.78          | 0.013 | -             | -     |
| <b>PFDPP-2</b> | 0.77          | 0.029 | -             | -     |
| <b>PFDPP-3</b> | 0.70          | 0.013 | 1.16          | 0.023 |

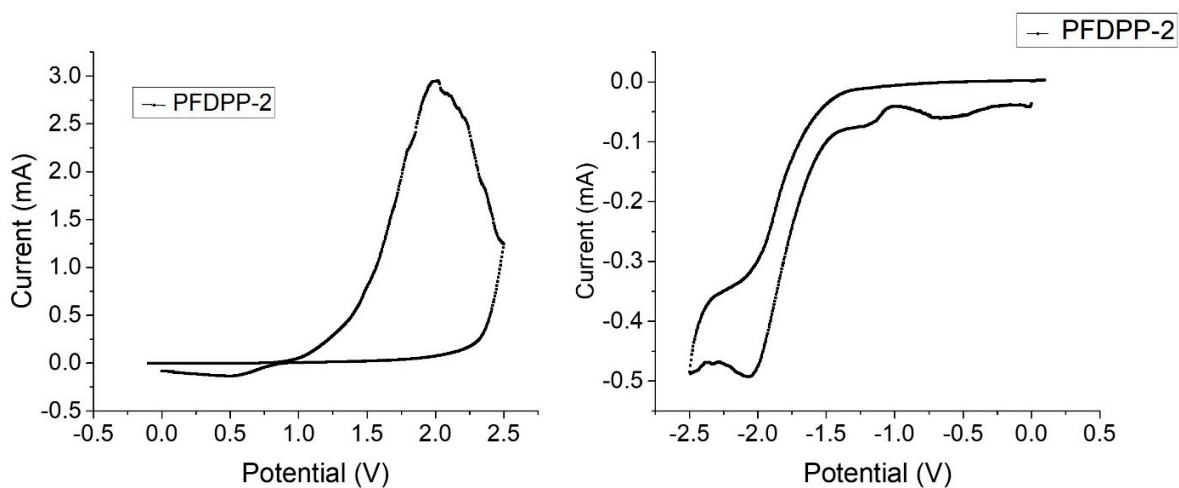

**Figure S6.** Cyclic voltammograms of **PFDPP-2** film polymer (oxidation left and reduction right).

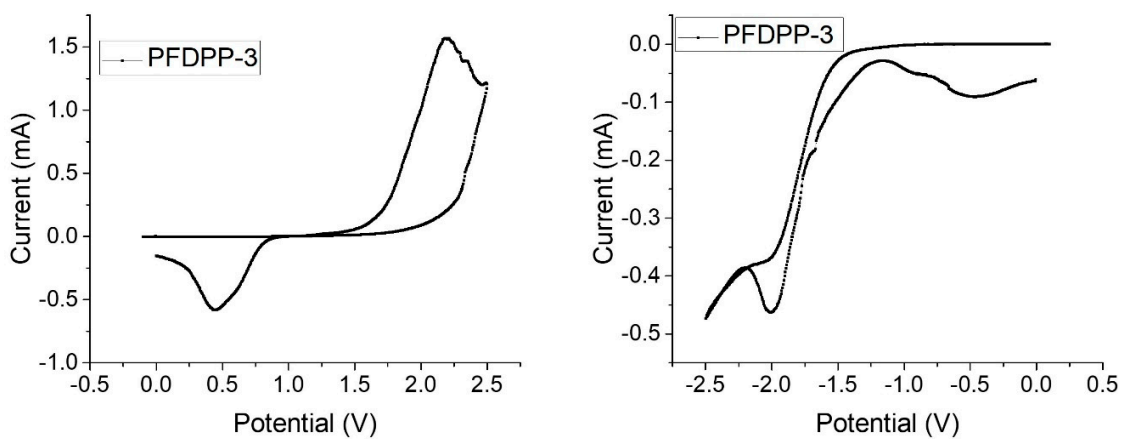

**Figure S7.** Cyclic voltammograms of **PFDPP-3** film polymer (oxidation left and reduction right).
